# Supplementary material for: Rapid detection of internalizing diagnosis in young children enabled by wearable sensors and machine learning
Source: PLoS One. 2019 Jan 16;14(1):e0210267. doi: 10.1371/journal.pone.0210267 (PMC6334916; doi:10.1371/journal.pone.0210267)
Supplement: S1 File — (XLSX) [file pone.0210267.s001.xlsx]

## Sheet: Sheet1
PID	INTdx	CBCL_internal	CBCL_AnxProb	CBCL_DepProb	pre_ah_mean	pre_ah_rms	pre_ah_skew	pre_ah_kurtosis	pre_ah_range	pre_ah_max	pre_ah_min	pre_ah_std	pre_ah_peak2rms	pre_ah_cov_ht0	pre_ah_cov_loc_pk1	pre_ah_cov_ht_pk1	pre_ah_spk_loc_pk1	pre_ah_spk_loc_pk2	pre_ah_spk_loc_pk3	pre_ah_spk_loc_pk4	pre_ah_spk_loc_pk5	pre_ah_spk_loc_pk6	pre_ah_spk_ht_pk1	pre_ah_spk_ht_pk2	pre_ah_spk_ht_pk3	pre_ah_spk_ht_pk4	pre_ah_spk_ht_pk5	pre_ah_spk_ht_pk6	pre_ah_spw_band1	pre_ah_spw_band2	pre_ah_spw_band3	pre_ah_spw_band4	pre_ah_spw_band5	pre_av_mean	pre_av_rms	pre_av_skew	pre_av_kurtosis	pre_av_range	pre_av_max	pre_av_min	pre_av_std	pre_av_peak2rms	pre_av_cov_ht0	pre_av_cov_loc_pk1	pre_av_cov_ht_pk1	pre_av_spk_loc_pk1	pre_av_spk_loc_pk2	pre_av_spk_loc_pk3	pre_av_spk_loc_pk4
58	1	43	51	50	0.0688811	0.0822287	1.38413	6.01045	0.357588	0.357899	0.000311465	0.0449218	4.35248	13.5231	0.5	9.4833	0.0732422	0.415039	1.00098	1.48926	1.83105	2.90527	0.0130439	0.00368449	0.00106068	0.000549052	0.000530434	0.000515439	0.016824	0.0185366	0.0130946	0.00739715	0.00501791	-0.00605326	0.0508309	0.491296	6.19469	0.603784	0.34028	-0.263504	0.0504818	6.69436	5.16755	0.41	0.113896	1.3916	2.80762	3.68652	4.24805
69	1	37	50	52	0.0545897	0.0653223	2.17243	12.9446	0.370249	0.371014	0.000764914	0.0358833	5.67974	8.534	0.41	6.03915	0.0732422	0.537109	1.12305	1.44043	2.49023	3.22266	0.0135808	0.00108725	0.000960635	0.00043216	0.000314073	0.000347222	0.012002	0.0119395	0.00796703	0.00633133	0.00372084	-0.00805011	0.0484699	-0.0863683	6.76494	0.503683	0.229281	-0.274403	0.0478086	5.6613	4.69865	0.55	0.464295	1.68457	2.31934	2.75879	3.61328
175	2	68	64	52	0.058482	0.0753628	2.16703	9.53175	0.380314	0.381253	0.000939692	0.0475452	5.05891	11.3591	0.6	7.80756	0.12207	0.878906	1.29395	1.7334	2.09961	3.4668	0.0110452	0.00124977	0.00149065	0.000434905	0.000318188	0.00053829	0.0190596	0.0145176	0.0158001	0.00790067	0.00339031	-0.011495	0.0515727	0.000283747	7.38029	0.497643	0.234987	-0.262656	0.0502879	5.09293	5.31949	0.69	0.470978	0.976562	1.3916	1.70898	3.66211
7007	1	37	50	50	0.0614999	0.0794868	2.14493	10.7565	0.468427	0.468742	0.000314367	0.0503704	5.8971	12.6363	0.35	8.09737	0.0732422	0.512695	0.976562	1.48926	2.05078	2.68555	0.0209253	0.00364112	0.00347743	0.00106934	0.000696707	0.000496485	0.0314245	0.0158745	0.0157808	0.0108409	0.0030562	-0.00679366	0.0532575	0.60605	6.86289	0.550671	0.362682	-0.187988	0.0528356	6.80997	5.67273	0.37	0.484478	0.0244141	0.537109	1.46484	2.19727
7008	1	41	51	50	0.0708485	0.101796	2.88426	16.6291	0.788908	0.790171	0.00126347	0.0731135	7.7623	20.7248	0.35	14.0395	0.0244141	0.390625	0.830078	1.46484	2.46582	3.19824	0.120186	0.00315406	0.00147935	0.00128762	0.00155229	0.00134108	0.0229714	0.0475264	0.0173703	0.0152155	0.00859607	-0.0129736	0.067275	0.914719	19.0614	1.08111	0.643363	-0.437747	0.0660287	9.56317	9.05186	0.48	1.25685	1.68457	3.90625	4.76074	5.10254
7022	1	56	57	52	0.0685945	0.0853877	2.0746	10.2923	0.456328	0.457785	0.00145736	0.050864	5.36125	14.5821	0.5	10.5924	0.0244141	0.463867	1.36719	1.85547	3.14941	3.85742	0.0981914	0.00183231	0.00111648	0.000929901	0.000891338	0.000788698	0.0111458	0.0292972	0.0159678	0.00948377	0.00538418	-0.00298546	0.108041	0.678331	88.8399	3.18133	1.66404	-1.51729	0.108027	15.402	23.3457	0.51	1.18126	3.88184	5.59082	5.95703	6.39648
7023	1	50	52	52	0.241378	0.368117	1.72613	6.55692	1.97201	1.97315	0.00113972	0.278002	5.36013	271.02	0.4	197.157	0.0244141	0.683594	1.51367	2.09961	2.68555	3.90625	1.6078	0.00869334	0.012037	0.0149727	0.0216117	0.0111063	0.12005	0.526356	0.384055	0.294173	0.113852	-0.0251578	0.302488	0.732775	11.5398	3.74743	2.06706	-1.68037	0.301516	6.83353	182.999	0.56	22.4743	2.05078	2.39258	3.00293	3.32031
7029	1	33	50	50	0.158325	0.237677	2.6539	13.2585	1.56775	1.56813	0.000388285	0.177311	6.59776	112.981	0.32	66.2171	0.0732422	0.390625	0.854492	1.2207	1.66016	2.44141	0.189193	0.0431323	0.0148566	0.0191732	0.00737166	0.00589901	0.24291	0.19448	0.210249	0.0934016	0.0350221	-0.0150918	0.166607	0.245773	5.95221	1.42753	0.735291	-0.692237	0.165963	4.41334	55.5156	0.34	1.92139	0.927734	1.87988	2.46582	3.49121
7031	2	33	50	50	0.169248	0.246228	2.31784	10.9935	1.69907	1.69973	0.000658193	0.178884	6.90306	121.257	0.46	81.1317	0.12207	0.65918	1.07422	2.05078	3.80859	4.80957	0.204761	0.0194935	0.00683962	0.0298128	0.00715161	0.00656657	0.13474	0.403531	0.137705	0.0934868	0.0532382	-0.0141349	0.331493	3.29818	45.7739	6.41281	4.25454	-2.15827	0.331274	12.8345	219.775	0.41	71.775	1.68457	2.05078	2.36816	3.05176
7062	2	46	50	52	0.0593609	0.077991	2.26823	10.1115	0.445363	0.446038	0.000674959	0.050598	5.71909	12.1652	0.42	7.69541	0.0732422	0.512695	0.878906	1.2207	2.36816	3.125	0.0177641	0.00316364	0.00161484	0.00078038	0.00114335	0.000792588	0.0224591	0.0230429	0.015816	0.00677641	0.00525893	-0.0191614	0.0502128	1.01875	10.8887	0.552493	0.318014	-0.234479	0.0464246	6.33332	5.04265	0.41	1.17921	0.0732422	4.10156	4.56543	4.88281
7069	2	48	52	52	0.0679325	0.111475	3.68801	21.7226	0.833436	0.833849	0.000412596	0.088407	7.48013	24.8534	0.52	16.3604	0.219727	0.537109	1.44043	1.78223	2.34375	4.19922	0.02644	0.00151147	0.00329397	0.0023853	0.00155142	0.00104018	0.0284028	0.0775414	0.0325517	0.015554	0.00990891	0.00167597	0.0704932	2.01919	20.8314	0.958587	0.591435	-0.367152	0.0704909	8.38995	9.9386	0.55	1.58979	1.41602	1.78223	3.125	3.97949
7071	2	49	51	51	0.222985	0.286904	2.14932	12.6132	1.81673	1.81813	0.00139871	0.180578	6.33705	161.5	0.49	113.264	0.0244141	0.488281	1.00098	1.70898	2.02637	2.85645	1.06997	0.0259583	0.0163026	0.0115879	0.0252695	0.00694761	0.173444	0.500793	0.168419	0.107396	0.0499118	-0.012272	0.209489	0.579962	9.90885	2.85002	1.87168	-0.978339	0.209183	8.93449	86.1039	0.46	26.9485	1.61133	2.02637	2.85645	4.1748
7075	2				0.0951115	0.188056	16.4119	363.924	4.30747	4.30898	0.00151613	0.162271	22.9133	70.73	0.55	31.8919	0.12207	0.439453	0.78125	1.70898	2.02637	3.73535	0.0587559	0.0110674	0.00444175	0.0111636	0.00604324	0.00490599	0.0873819	0.34362	0.208293	0.0938504	0.0612482	-0.0206765	0.227469	-17.8528	448.097	7.80999	1.54542	-6.26457	0.226584	27.5403	103.484	0.55	11.954	0.0244141	2.19727	2.56348	4.27246
7105	2	69	70	70	0.0929726	0.136539	2.00244	6.96348	0.576525	0.576875	0.00034971	0.10002	4.22499	37.2857	0.43	23.4607	0.0732422	0.390625	0.830078	1.2207	2.29492	4.27246	0.0105166	0.0259547	0.00568289	0.00342595	0.00260935	0.00173633	0.0587216	0.0730926	0.0410287	0.0256141	0.0139897	-0.0117687	0.0825808	1.82463	27.1044	1.38961	0.911757	-0.477854	0.0817583	11.0408	13.6392	0.34	0.394144	2.75879	3.07617	4.27246	5.0293
7106	2	48	52	50	0.112456	0.157133	3.29876	21.5706	1.18709	1.18727	0.000185051	0.109775	7.55582	49.3818	0.43	30.6087	0.0732422	0.585938	0.952148	1.53809	4.12598	4.63867	0.0519631	0.0135557	0.00586855	0.0041793	0.00280479	0.00327275	0.126742	0.107629	0.0507369	0.0304256	0.0143369	-0.039144	0.116813	2.99489	40.6139	1.91492	1.37968	-0.535236	0.110087	11.811	27.2906	0.58	6.37597	0.0244141	2.70996	3.39355	3.93066
7107	2	34	50	52	0.0864941	0.13763	4.82975	41.154	1.34523	1.34602	0.000790404	0.107082	9.77997	37.8843	0.34	21.4991	0.170898	0.537109	0.952148	2.09961	2.68555	3.05176	0.0445219	0.0112627	0.0071483	0.00314412	0.00201922	0.00208551	0.10615	0.0942792	0.0476465	0.0165495	0.0230412	-0.0169944	0.0996267	1.22432	20.5058	1.44214	0.903004	-0.539132	0.0981911	9.06387	19.851	0.32	1.45986	0.0244141	1.19629	1.7334	2.51465
7115	2				0.0749173	0.0915376	2.15884	11.684	0.524418	0.527047	0.00262881	0.0526111	5.75771	16.7583	0.47	10.7799	0.12207	0.732422	1.26953	1.78223	3.125	7.9834	0.0134512	0.00229638	0.00255122	0.000836456	0.00077728	0.000490544	0.035423	0.0221717	0.0178287	0.0103827	0.00685107	-0.0166733	0.0536555	0.368051	7.00693	0.543879	0.260354	-0.283525	0.0510119	5.28416	5.75783	0.38	0.428056	1.34277	2.19727	2.75879	3.85742
7126	1	45	50	52	0.0647888	0.0802684	1.3895	5.25934	0.344463	0.345335	0.000871805	0.0473978	4.30225	12.886	0.39	9.97136	0.0732422	0.610352	1.0498	3.80859	4.5166	4.90723	0.0218416	0.00068268	0.000670118	0.000405798	0.000290577	0.000379208	0.0135587	0.013926	0.0111625	0.00588641	0.00318426	0.000156324	0.0429411	0.126586	5.7157	0.436549	0.266114	-0.170435	0.0429516	6.19719	3.68788	0.51	0.584865	3.4668	4.32129	5.15137	5.71289
7128	2	66	70	64	0.162115	0.198203	1.90362	10.6381	1.13659	1.13734	0.000745117	0.114059	5.73824	78.5687	0.46	60.4084	0.0732422	0.439453	1.53809	1.87988	2.24609	2.66113	0.0898089	0.00985734	0.00425957	0.00860769	0.0031599	0.00440983	0.0485227	0.149261	0.0683622	0.0385079	0.0269584	-0.00253117	0.103129	1.81619	38.5396	2.31068	1.29091	-1.01976	0.103124	12.5175	21.2712	0.55	2.24286	2.05078	5.24902	6.56738	6.95801
7144	1	33	50	50	0.0344665	0.0425303	2.6308	15.6632	0.238665	0.240133	0.00146718	0.0249238	5.64615	3.61766	0.36	2.54676	0.0732422	0.415039	0.805664	1.17188	1.92871	2.41699	0.00466219	0.000602389	0.000233807	0.000192344	0.000216949	0.000178563	0.00482995	0.00507463	0.00554506	0.0020284	0.00158541	0.000313199	0.0290835	0.341795	6.66193	0.308138	0.178364	-0.129774	0.0290891	6.13282	1.6917	0.42	0.132086	1.2207	2.68555	3.54004	4.02832
7158	2	54	54	52	0.0655408	0.0883783	2.71899	13.6466	0.51543	0.516636	0.00120606	0.0593032	5.84574	15.6214	0.51	11.6997	0.0732422	0.439453	0.805664	1.17188	1.61133	7.6416	0.0374475	0.00264735	0.000561657	0.000335843	0.00200762	0.000473765	0.0143832	0.0244692	0.0166326	0.0113643	0.00464504	-0.00513388	0.0552031	1.29825	12.986	0.756918	0.45158	-0.305337	0.0549777	8.18034	6.09478	0.34	0.0661476	1.63574	2.85645	3.68652	4.24805
29	1	33	50	50	0.0490092	0.0588667	1.45521	6.02994	0.219998	0.222582	0.0025837	0.0326178	3.78111	6.93059	0.34	5.05208	0.0732422	0.610352	1.07422	4.56543	5.10254	6.54297	0.00292686	0.00104407	0.000284936	0.000232454	0.000255677	0.000229761	0.00898579	0.00954251	0.00972426	0.00420927	0.0022338	0.00838641	0.0429684	0.308946	9.25338	0.488323	0.277919	-0.210404	0.0421526	6.46799	3.69257	0.52	0.431056	3.05176	3.56445	4.24805	6.17676
46	1	43	50	51	0.0406034	0.047253	1.38749	7.04285	0.210032	0.210804	0.000771361	0.0241764	4.46117	4.46569	0.35	3.33348	0.0732422	0.415039	1.02539	1.83105	2.27051	6.25	0.00204729	0.000672622	0.000387612	0.00025442	0.000173134	0.000145475	0.00366262	0.00560607	0.0044021	0.00339749	0.0022426	0.00126936	0.0366259	-0.0175558	8.59646	0.548506	0.257157	-0.291349	0.036613	7.95472	2.68291	0.47	0.195319	1.24512	2.22168	2.92969	3.32031
86	1	43	55	51	0.0935337	0.127028	2.36715	10.7902	0.670979	0.672447	0.00146879	0.0859731	5.29368	32.2725	0.33	22.3649	0.0244141	0.537109	0.878906	1.36719	5.51758	6.10352	0.1837	0.00784533	0.00319003	0.00170796	0.00190297	0.00141159	0.0743426	0.0400424	0.0525539	0.0141136	0.00661625	-0.00911887	0.0682997	1.75795	15.7059	1.00019	0.606951	-0.393241	0.0677052	8.88657	9.32971	0.51	0.964837	1.87988	2.39258	3.83301	4.24805
89	2	41	50	52	0.0688739	0.10086	2.33087	10.4144	0.622256	0.622979	0.000722543	0.0737013	6.17666	20.3456	0.41	14.101	0.0244141	0.439453	0.927734	1.26953	1.97754	2.83203	0.102467	0.00179786	0.00269969	0.00158031	0.000842598	0.000436637	0.0358064	0.0201923	0.0213039	0.00924806	0.00431904	0.00606727	0.0761395	1.42206	15.2311	1.04618	0.629802	-0.416379	0.0759164	8.27169	11.5944	0.37	0.262173	1.12305	1.80664	2.24609	4.95605
163	1	37	50	50	0.0688839	0.107113	5.81252	56.6665	1.18847	1.18966	0.00118889	0.0820469	11.1065	22.6942	0.49	15.1481	0.0244141	0.341797	1.44043	2.00195	4.00391	4.61426	0.102884	0.00948062	0.00191405	0.00158218	0.000749631	0.000848847	0.0270005	0.0534245	0.0243326	0.0197033	0.00668236	0.00533613	0.0598251	0.799998	12.6298	0.867329	0.46953	-0.397799	0.0596017	7.84838	7.07935	0.46	1.3337	0.854492	2.22168	3.39355	3.78418
171	1	43	50	50	0.0631727	0.0824979	1.92075	8.7977	0.452503	0.453715	0.00121131	0.0530709	5.49971	13.6118	0.52	9.40586	0.0732422	0.463867	1.02539	1.58691	6.49414	7.17773	0.0112892	0.00183147	0.00141893	0.000418773	0.000517442	0.000416734	0.0174486	0.0126904	0.0200418	0.00808861	0.00420764	-0.00031739	0.0514431	1.2439	22.0803	0.924787	0.570768	-0.354019	0.051455	11.0951	5.29278	0.47	0.882636	3.71094	4.19922	4.58984	4.93164
177	1	48	52	50	0.0594097	0.0789337	2.54562	12.0287	0.410352	0.411493	0.00114099	0.0519843	5.21315	12.461	0.61	9.09572	0.0244141	0.415039	0.805664	1.26953	1.68457	3.19824	0.0771065	0.00116371	0.00140432	0.00106741	0.000716686	0.000273976	0.01789	0.0136085	0.0107206	0.00708211	0.00273745	0.00133689	0.0413487	1.90121	21.1834	0.663978	0.440546	-0.223432	0.0413374	10.6544	3.41942	0.55	0.592589	1.5625	1.87988	3.36914	3.78418
179	1	33	50	50	0.0479075	0.0714115	4.98477	43.6509	0.74125	0.741728	0.000477661	0.0529706	10.3867	10.1992	0.33	7.21287	0.0244141	0.390625	1.2207	2.19727	3.125	4.39453	0.0527092	0.00104251	0.000741383	0.000476501	0.000389322	0.00037705	0.0113004	0.0154048	0.0106157	0.00943583	0.00675215	0.0134154	0.0404335	0.531254	13.0955	0.518198	0.300212	-0.217986	0.0381526	7.42484	3.26973	0.62	0.727837	0.0244141	1.7334	3.32031	3.73535
181	1	41	51	50	0.0411789	0.0533575	2.08605	8.55468	0.246008	0.246485	0.000477184	0.0339396	4.61951	5.69404	0.38	4.36592	0.0732422	0.683594	1.07422	1.80664	2.24609	2.83203	0.00745015	0.000485474	0.000177844	0.000194194	0.00049722	0.000304735	0.00522807	0.00960266	0.00623041	0.00300039	0.00201573	-0.00333768	0.0429646	0.712438	15.2672	0.68735	0.390049	-0.297301	0.0428455	9.07839	3.69191	0.32	0.617026	1.14746	3.07617	4.46777	5.07812
7066	1	29	50	50	0.0397151	0.0491923	1.73077	7.17208	0.208631	0.209628	0.000996894	0.0290346	4.26139	4.83976	0.37	3.35798	0.0732422	0.561523	1.17188	1.58691	2.24609	5.59082	0.00584674	0.000878641	0.000499921	0.000307273	0.000145448	0.000151192	0.00735693	0.00623121	0.0052927	0.00368063	0.00244776	0.00604375	0.0325209	0.29282	5.77185	0.318671	0.1731	-0.145571	0.0319623	5.32274	2.11521	0.33	0.0418051	2.7832	3.22266	4.22363	4.76074
7070	1	29	50	50	0.0700235	0.0825206	0.91484	3.67903	0.279243	0.280012	0.000768349	0.0436727	3.39324	13.6193	0.38	10.4823	0.0244141	0.512695	0.90332	1.26953	1.68457	3.00293	0.0984362	0.00261894	0.00139822	0.000574452	0.000758093	0.000637415	0.0186499	0.0176781	0.00848357	0.00589976	0.00307925	-0.00609602	0.0446943	1.97892	16.8162	0.553656	0.404861	-0.148795	0.0442877	9.05844	3.99517	0.33	0.339361	3.10059	3.85742	5.0293	5.7373
7072	1	37	50	50	0.0378593	0.0452508	1.79767	8.73323	0.200163	0.200991	0.00082798	0.0247915	4.4417	4.09527	0.72	2.82226	0.0732422	0.439453	0.830078	1.36719	1.75781	3.32031	0.00370855	0.000475116	0.000553725	0.000321951	0.000170543	0.000152611	0.00507507	0.00571037	0.00472861	0.00286283	0.00221062	-0.00854353	0.0329896	0.525757	8.71635	0.431679	0.260251	-0.171428	0.0318721	7.88888	2.17662	0.63	0.275718	3.34473	3.68652	4.07715	4.73633
7073	1	47	55	50	0.050569	0.0574586	0.674902	3.70602	0.219918	0.221187	0.00126887	0.0272879	3.8495	6.60297	0.35	5.19905	0.0732422	0.683594	1.0498	1.5625	2.46582	8.05664	0.00587336	0.000592088	0.000219634	0.000401537	0.000305612	0.00018561	0.00564718	0.00713498	0.00586659	0.0039257	0.00269227	-0.00751237	0.0327806	0.144002	3.81333	0.287985	0.132287	-0.155698	0.0319161	4.74969	2.14913	0.37	0.0952988	3.2959	4.15039	4.6875	5.51758
7074	1	48	51	50	0.0588083	0.0785645	2.49295	11.7558	0.406746	0.407938	0.00119149	0.0521088	5.19239	12.3448	0.41	8.5752	0.0732422	0.732422	1.17188	1.68457	2.12402	3.6377	0.012005	0.00214853	0.000736315	0.000294697	0.000698975	0.000336897	0.0259226	0.012688	0.009132	0.0048394	0.0034467	-0.00761275	0.0534077	3.19591	35.4442	0.880175	0.6558	-0.224375	0.0528756	12.2791	5.70477	0.53	0.338694	1.87988	2.58789	3.54004	4.73633
7076	1	33	50	50	0.0694721	0.0822135	1.29048	5.54097	0.324936	0.327109	0.00217348	0.0439733	3.97878	13.5181	0.35	10.3531	0.0732422	0.708008	1.46484	1.9043	3.32031	6.49414	0.00884826	0.00136735	0.000797131	0.000766007	0.000485372	0.000405944	0.0119497	0.0191365	0.01544	0.00667941	0.00413632	0.00154531	0.0446447	0.683502	6.7113	0.430267	0.264434	-0.165833	0.0446291	5.92309	3.98629	0.37	0.10758	4.12598	4.80957	5.29785	5.63965
7077	1	45	50	51	0.0638543	0.0870447	3.20274	18.5483	0.54277	0.543775	0.00100446	0.0591705	6.24708	15.1535	0.44	10.2836	0.0732422	0.610352	1.31836	1.85547	2.27051	2.80762	0.0252509	0.00189879	0.00160948	0.00109593	0.00101455	0.000870612	0.0254029	0.0362641	0.0201421	0.00775204	0.00439273	-0.01692	0.0718499	0.919076	11.6945	0.872925	0.473887	-0.399038	0.0698467	6.59552	10.3248	0.48	0.735602	3.32031	3.97949	4.32129	4.80957
7078	1	49	50	56	0.0547748	0.0763269	3.66907	25.2889	0.582701	0.584016	0.00131515	0.0531689	7.6515	11.6516	0.34	7.60198	0.0732422	0.512695	0.90332	1.26953	2.0752	2.66113	0.014347	0.00237723	0.00125748	0.00105961	0.00109723	0.000653544	0.0232468	0.0275228	0.0125885	0.00495851	0.00310034	-0.00279643	0.0395243	0.462724	7.67945	0.459944	0.229765	-0.230179	0.0394351	5.82374	3.12434	0.36	0.133161	1.3916	2.66113	2.97852	4.58984
7081	1	29	50	51	0.100158	0.149919	2.08415	8.38612	0.82649	0.827205	0.000714823	0.11158	5.51769	44.9513	0.47	34.5483	0.0244141	0.537109	0.927734	1.61133	2.02637	5.2002	0.213935	0.00405893	0.00220114	0.00232685	0.00686383	0.00168443	0.031103	0.100783	0.0479354	0.0247621	0.0135376	0.00485806	0.102868	1.57254	13.4145	1.20496	0.825105	-0.379851	0.102779	8.02098	21.1638	0.49	4.36799	2.14844	3.54004	4.05273	6.32324
7084	2	48	52	52	0.149091	0.282013	4.46421	31.4617	3.05002	3.05088	0.000867899	0.239441	10.8182	159.063	0.34	61.6042	0.0244141	0.341797	0.65918	1.2207	1.5625	2.14844	0.540103	0.0428613	0.022733	0.0432215	0.0362765	0.0164421	0.500698	0.650578	0.16016	0.0935532	0.0987592	-0.0088452	0.236208	2.69468	23.1532	3.04324	1.97637	-1.06687	0.236101	8.36708	111.588	0.36	-6.62776	1.41602	2.17285	2.83203	4.49219
7085	2	65	73	52	0.0580925	0.0778948	1.85285	7.16525	0.370653	0.371167	0.000514244	0.0519058	4.76498	12.1352	0.31	8.80569	0.0732422	0.537109	0.854492	1.26953	2.7832	3.93066	0.0186203	0.0020235	0.00116738	0.000526444	0.000569291	0.000420368	0.0175172	0.0158552	0.011764	0.00548695	0.00650951	-0.00150945	0.039347	0.659515	8.60346	0.456603	0.266775	-0.189828	0.0393279	6.78006	3.09637	0.54	0.288575	1.34277	3.34473	3.78418	5.05371
7086	2	47	61	56	0.085967	0.111951	2.52166	13.9747	0.671407	0.672353	0.000945726	0.0717308	6.00577	25.0661	0.36	16.9284	0.170898	0.610352	1.02539	1.44043	1.80664	5.78613	0.0212452	0.00398596	0.00363303	0.00197044	0.00195946	0.00161022	0.0424961	0.0406115	0.0285872	0.0178598	0.00897118	-0.0141681	0.0946432	1.77756	16.5359	1.25448	0.824662	-0.429817	0.0936001	8.71338	17.9147	0.72	1.76885	0.878906	1.70898	2.85645	3.32031
7092	1	33	50	50	0.0728117	0.0973445	2.52671	14.2298	0.670986	0.672482	0.00149632	0.0646258	6.90827	18.9519	0.4	13.3628	0.12207	0.463867	1.24512	1.58691	1.9043	3.27148	0.0132572	0.00337638	0.00127229	0.000886311	0.000895304	0.000775025	0.0220825	0.0245602	0.0230731	0.0124412	0.00440167	-0.00527295	0.056792	0.546069	10.5629	0.676337	0.304678	-0.371658	0.0565608	6.54421	6.45065	0.41	0.784425	2.53906	3.02734	4.80957	5.27344
7095	1	29	50	51	0.0650006	0.0925229	2.97058	16.9691	0.680701	0.681299	0.000598117	0.0658603	7.36357	17.121	0.55	11.9476	0.0244141	0.683594	1.19629	1.53809	3.83301	7.73926	0.0959401	0.00198425	0.00130419	0.00177679	0.00056954	0.000419743	0.0279928	0.0304398	0.0156185	0.00810494	0.00737725	-0.00317276	0.0568681	0.645246	19.7296	0.924969	0.471513	-0.453456	0.0567938	8.29134	6.46797	0.54	1.15082	3.19824	4.02832	5.2002	5.85938
7097	1	45	52	50	0.0289036	0.0324854	0.585757	3.0846	0.0852388	0.0864225	0.00118373	0.014832	2.66035	2.1106	0.42	1.67669	0.0732422	0.585938	4.22363	4.56543	6.17676	7.12891	0.00173348	6.51974e-05	6.75396e-05	6.287e-05	4.90234e-05	6.23691e-05	0.000581035	0.00160371	0.00199469	0.00149175	0.00142536	-0.00110185	0.0232509	-0.0312333	3.27135	0.151135	0.0759525	-0.0751821	0.0232306	3.26665	1.08121	0.43	0.0693638	0.170898	0.561523	2.19727	4.15039
7100	2	47	61	52	0.0706331	0.108317	4.07613	30.9671	0.97674	0.977069	0.000329118	0.0821393	9.02048	23.465	0.37	12.591	0.0732422	0.488281	1.00098	1.41602	1.7334	2.31934	0.0443963	0.00182455	0.00204181	0.00444752	0.0021933	0.00137873	0.0486337	0.065497	0.0264719	0.0127655	0.00878909	-0.0110441	0.0713116	1.83597	17.6571	0.945697	0.561463	-0.384234	0.0704688	7.87338	10.1707	0.48	1.58974	0.65918	1.34277	2.00195	2.31934
7102	2	63	75	52	0.101176	0.133105	2.15343	9.54829	0.624163	0.624679	0.000516059	0.0865104	4.69314	35.4337	0.63	26.0347	0.0244141	0.341797	0.805664	1.58691	2.02637	2.36816	0.207107	0.0049622	0.00237583	0.0123232	0.00184619	0.00224338	0.0276715	0.116747	0.0508239	0.020791	0.0104067	-0.0226549	0.0918438	-0.173151	7.89174	1.02114	0.514765	-0.506379	0.0890281	5.60479	16.8706	0.66	4.45633	1.58691	3.07617	3.39355	4.10156
7103	2	41	57	64	0.129249	0.210084	11.4857	210.075	3.78389	3.78643	0.00253802	0.165661	18.0234	88.2704	0.42	33.121	0.219727	0.683594	1.00098	1.31836	1.68457	2.00195	0.0200999	0.0217657	0.0085602	0.0104492	0.00538707	0.00756592	0.272277	0.30422	0.130186	0.105442	0.0925752	0.010083	0.170855	6.13537	105.398	4.2981	3.23378	-1.06432	0.1706	18.927	58.383	0.31	2.76056	1.00098	1.48926	2.75879	3.10059
7104	1	54	52	52	0.0449674	0.0564357	2.69136	17.5383	0.385177	0.385612	0.000435694	0.0341103	6.83277	6.36999	0.31	4.61501	0.0244141	0.390625	1.02539	2.0752	5.22461	6.25	0.0408019	0.000366174	0.000596757	0.000200017	0.000291277	0.00019776	0.00776361	0.0069276	0.00886164	0.00416238	0.00299606	0.00478323	0.0442034	-0.385264	16.5358	0.745732	0.331222	-0.41451	0.0439548	9.37735	3.90788	0.51	0.488184	3.61328	4.3457	5.07812	5.81055
7108	1	29	50	51	0.060533	0.0783726	2.5442	12.8195	0.432716	0.433015	0.000299762	0.0497921	5.52509	12.2845	0.32	8.71809	0.0732422	0.708008	1.07422	1.5625	1.97754	2.88086	0.0149614	0.00117871	0.000546832	0.00167605	0.000381133	0.000423015	0.0135892	0.0199625	0.0148257	0.00818148	0.00302871	-0.00906134	0.0433175	0.923828	9.05882	0.488312	0.283144	-0.205167	0.0423698	6.53649	3.75281	0.51	0.578852	3.14941	3.56445	4.12598	5.44434
7109	1	43	50	50	0.0629017	0.0799596	2.41194	13.201	0.501307	0.502333	0.00102589	0.0493775	6.28233	12.7871	0.34	9.30553	0.12207	0.708008	1.12305	1.68457	2.39258	4.61426	0.00964217	0.00105757	0.00159214	0.000706081	0.000866726	0.000466919	0.0141809	0.0204338	0.0115093	0.00871314	0.00315606	0.00162121	0.0467288	1.53215	28.604	0.959447	0.554527	-0.404919	0.0467123	11.8669	4.36715	0.46	0.455115	2.39258	3.24707	3.90625	4.6875
7114	1	51	55	51	0.0601607	0.0773749	2.07132	10.3298	0.476825	0.478176	0.00135126	0.0486698	6.17999	11.9738	0.43	8.71439	0.0244141	0.341797	0.65918	1.19629	1.92871	4.58984	0.0729922	0.00126068	0.00127834	0.000871992	0.000487203	0.000629547	0.0152809	0.0152418	0.0117394	0.00707128	0.00571314	0.00525994	0.0505402	1.60765	22.1755	0.846505	0.561991	-0.284514	0.0502783	11.1197	5.10862	0.49	0.436114	0.292969	1.44043	2.41699	3.61328
7130	1	50	50	50	0.127749	0.181905	2.84778	14.0942	1.19383	1.19549	0.00165848	0.12953	6.57204	66.1789	0.51	47.2619	0.0976562	0.610352	1.17188	1.7334	2.09961	2.44141	0.0687252	0.00445969	0.00745005	0.00889245	0.00455128	0.00267805	0.0677697	0.174286	0.0616608	0.0265919	0.0252573	-0.00952561	0.203876	-0.358162	13.8	2.64823	1.22432	-1.42391	0.203705	6.9842	83.1311	0.5	21.9184	1.75781	2.14844	2.7832	4.12598
7131	2	48	52	50	0.059308	0.0851274	3.87986	25.463	0.666961	0.667602	0.000640583	0.0610827	7.84238	14.4933	0.32	9.1469	0.12207	0.683594	1.58691	2.29492	3.6377	6.71387	0.0120492	0.00275544	0.00138103	0.000904389	0.000542518	0.000907211	0.0277106	0.0289397	0.0256506	0.0112427	0.00719635	-0.00545157	0.1135	3.32001	57.8577	2.2102	1.3768	-0.833395	0.113397	12.1304	25.7645	0.64	3.01481	3.34473	3.88184	4.83398	6.34766
7133	1	41	52	50	0.0732977	0.0950369	2.5996	13.2607	0.524984	0.52723	0.00224602	0.0605086	5.54764	18.064	0.49	11.9355	0.0732422	0.512695	1.36719	2.09961	3.6377	4.05273	0.014484	0.00177604	0.000800823	0.00111305	0.000859732	0.000798532	0.0235193	0.0366642	0.0223551	0.0150261	0.00654997	-0.00526471	0.0506861	0.312909	4.08341	0.384847	0.186412	-0.198434	0.0504245	3.91497	5.13816	0.53	0.391297	1.2207	1.61133	2.05078	3.2959
7139	1	41	51	51	0.0462024	0.0700017	3.22204	15.6439	0.43833	0.438503	0.000172775	0.0526019	6.26418	9.80048	0.44	7.49386	0.0732422	0.463867	0.830078	1.5625	1.9043	4.95605	0.0183775	0.000848776	0.000378939	0.00022362	0.000707136	0.000218212	0.00574493	0.0171896	0.00748665	0.00421423	0.00336521	-0.0019547	0.0427445	0.676277	19.2142	0.669158	0.343164	-0.325993	0.0427105	8.02827	3.65418	0.48	0.963535	2.00195	4.41895	5.32227	6.22559
7142	1	29	50	50	0.0501581	0.0723744	2.78128	11.9437	0.368266	0.369062	0.000795728	0.0521879	5.09934	10.4761	0.39	6.97607	0.0732422	0.415039	0.78125	1.34277	2.12402	2.6123	0.020741	0.000363173	0.00190765	0.000535028	0.000686942	0.000333169	0.0228689	0.0133632	0.0127761	0.00614823	0.00360103	-0.00595298	0.0447688	0.765611	14.4022	0.550342	0.298435	-0.251907	0.0443823	6.66615	4.00848	0.53	0.409618	0.0244141	2.19727	3.80859	4.46777
7145	1	64	60	56	0.0591779	0.0880182	6.84932	79.9442	1.09827	1.09999	0.00171149	0.0651714	12.4973	15.4944	0.63	8.81592	0.0732422	0.439453	0.78125	1.14746	1.48926	2.85645	0.0154808	0.000900912	0.00271023	0.000839235	0.00106722	0.00113182	0.0309758	0.0477277	0.017395	0.00592656	0.00526862	-0.0135034	0.0577267	-1.2271	17.6981	0.919565	0.356875	-0.56269	0.0561392	9.74748	6.66474	0.61	1.20109	0.0732422	4.78516	5.41992	7.8125
7147	1	29	50	50	0.0574597	0.0778186	3.37929	20.4209	0.523888	0.525325	0.00143698	0.0524929	6.75063	12.1115	0.33	7.85074	0.0732422	0.585938	1.07422	2.05078	5.78613	7.10449	0.0176692	0.00241035	0.00179543	0.000511443	0.000360352	0.000654812	0.0311636	0.0123257	0.0141071	0.00856138	0.00639628	-0.0188812	0.0528853	0.520139	7.52553	0.535099	0.274521	-0.260578	0.0494123	5.19086	5.59372	0.35	0.837567	1.48926	2.51465	2.90527	3.6377
7151	2	48	50	56	0.0532975	0.063543	1.30388	5.45468	0.251979	0.253107	0.00112752	0.0346077	3.98323	8.07544	0.45	5.68946	0.0732422	0.683594	1.02539	1.3916	1.83105	3.07617	0.00370583	0.000940944	0.000302988	0.000387254	0.000252353	0.000347102	0.0117197	0.0104076	0.00984118	0.00551984	0.00299048	0.00508137	0.0322327	0.181393	4.05889	0.256249	0.134346	-0.121903	0.0318376	4.16801	2.0779	0.35	-0.101259	1.29395	2.46582	3.00293	3.51562
7152	1	48	51	60	0.0800556	0.1129	2.48497	11.3628	0.622424	0.623925	0.00150033	0.079629	5.52633	25.493	0.49	16.6746	0.0732422	0.585938	1.26953	1.66016	2.02637	3.44238	0.0557439	0.00545703	0.00178309	0.00259962	0.000969117	0.000807552	0.0553289	0.0479174	0.019829	0.0125105	0.00595073	0.00656735	0.0636383	1.63921	13.6248	0.725061	0.496207	-0.228853	0.0633143	7.79731	8.09966	0.32	-0.485271	0.830078	1.34277	2.97852	3.61328
7157	1	45	50	52	0.0662145	0.102609	3.38977	17.9953	0.688449	0.689601	0.00115234	0.0784051	6.72065	21.0573	0.31	13.7331	0.12207	0.463867	0.830078	1.14746	1.48926	3.02734	0.0217972	0.00568286	0.00455293	0.000710898	0.0014276	0.00109399	0.0554219	0.0312563	0.0220508	0.0165398	0.00845908	-0.0109358	0.0782693	1.58292	17.3722	1.08788	0.732724	-0.355159	0.077521	9.36158	12.2522	0.43	1.9181	0.390625	0.756836	1.58691	1.95312
[truncated: 477 more columns]
